# Supplementary material
Source: PubMed Central journal article supplement (PMC3724639)
Supplement: supp_M113.472654_jbc.M113.472654-1.pdf [file supp_M113.472654_jbc.M113.472654-1.pdf]

**Figure S1**

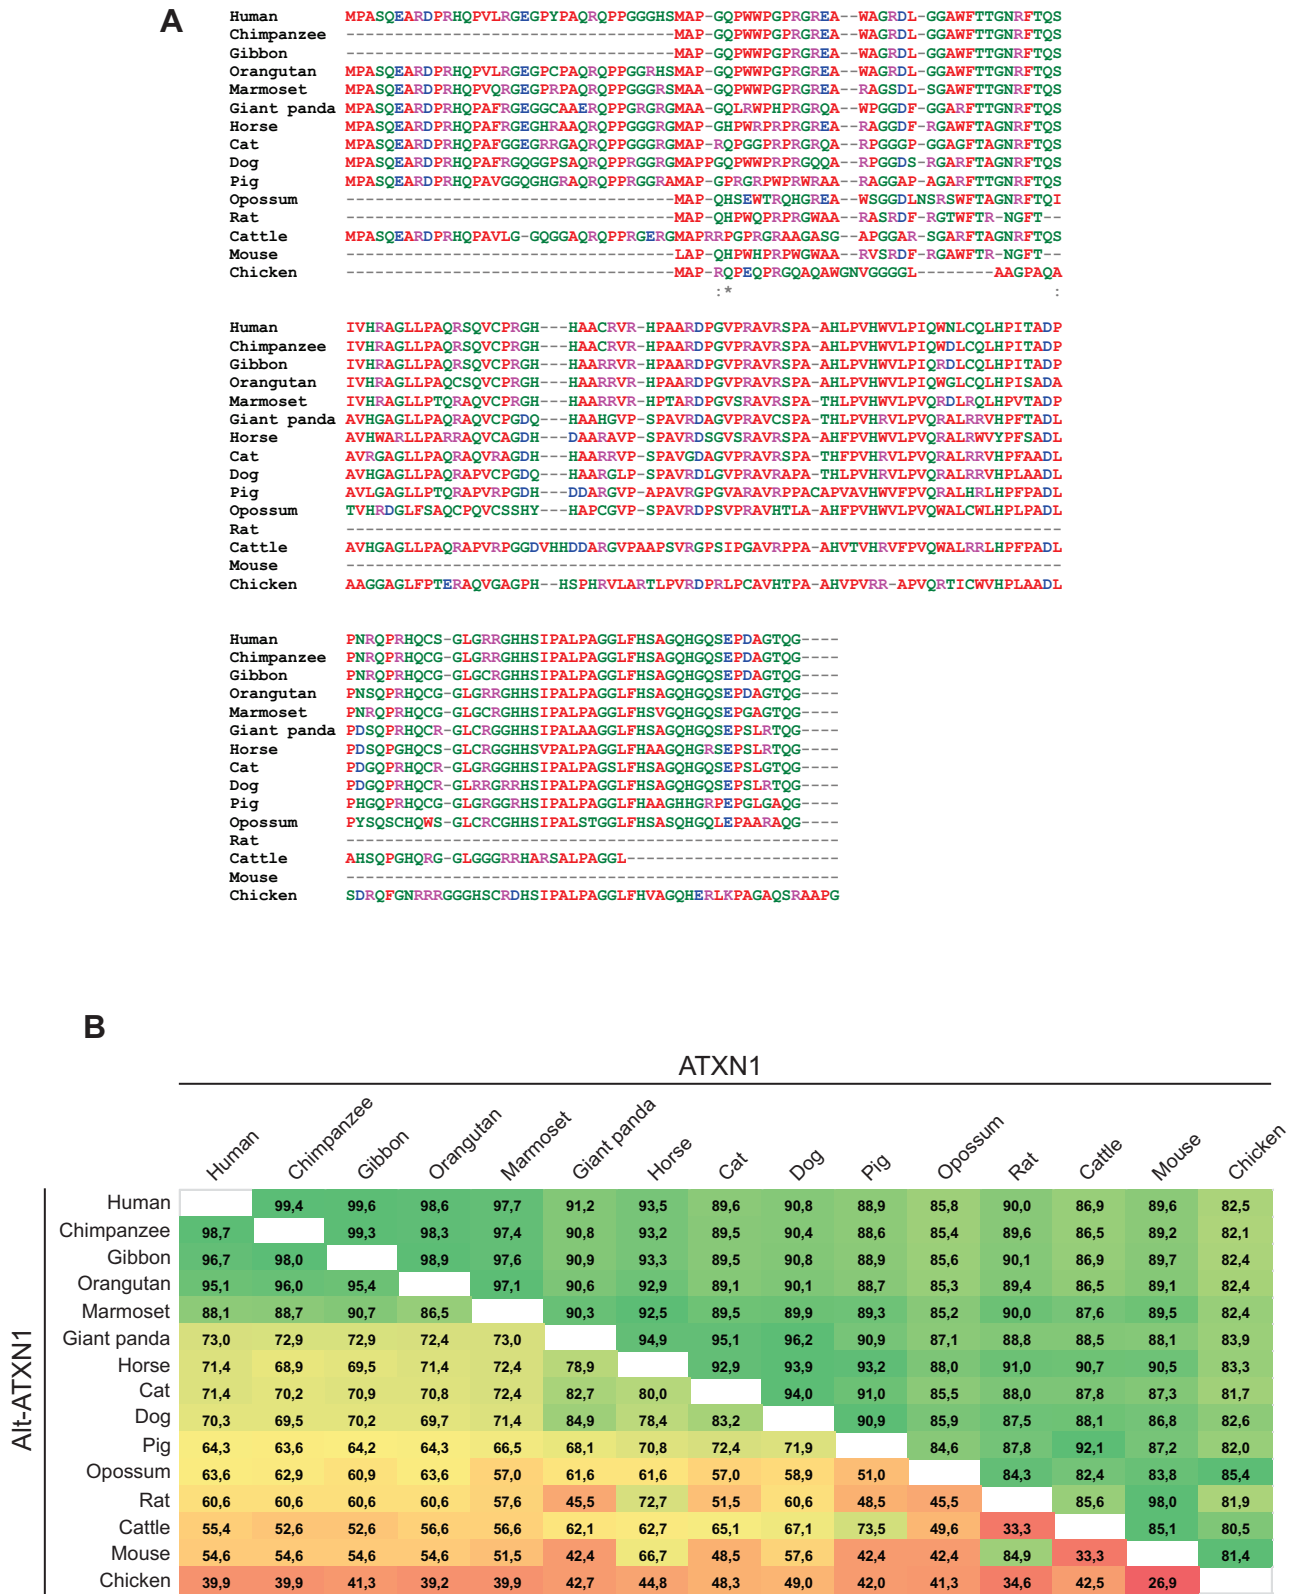

**Figure S1: Alt-ATXN1 is conserved among different species. (A)** Multiple sequence alignment of Alt-ATXN1 performed with Clustal Omega. The NCBI Gene Database was used to predict the protein sequences. **(B)** Comparison of the percent identity of ATXN1 (bottom left) and Alt-ATXN1 (top right) between human and eukaryotic species, obtained with Clustal Omega.
